# Supplementary material for: A dual role of human tRNA methyltransferase hTrmt13 in regulating translation and transcription
Source: PubMed Central journal article supplement — EMBO J. 2021 Dec 1;41(6):e108544. doi: 10.15252/embj.2021108544 (PMC8922252; doi:10.15252/embj.2021108544), 2021-12-01
Supplement: EMBJ-41-e108544-s006.pdf [file EMBJ-41-e108544-s006.pdf]

## Expanded View Figures

### Figure EV1. hTrmt13 is a human tRNA 2'-O-methyltransferase at position 4.

- A Verification of the customized anti-hTrmt13. The ability of anti-hTrmt13 for immunoprecipitation in MDA-MB-231 cells assayed by Western blot (left). The protein level of hTrmt13 in WT and KO MDA-MB-231 cells assayed by Western blot using customized antibody of hTrmt13, GAPDH was used as control. A total 20  $\mu\text{g}$  proteins of cell lysates were loaded.
- B SDS-PAGE analysis of the purified hTrmt13. Standard molecular weights are shown on the left.
- C The binding affinities of hTrmt13 for HctRNA<sup>Lys</sup>(UUU), HctRNA<sup>Arg</sup>(ACG), and HctRNA<sup>Phe</sup>(GAA) analyzed by EMSA. The concentration of tRNAs is 0.15  $\mu\text{M}$ .
- D The capacity of HctRNA<sup>Gly</sup>(GCC), HctRNA<sup>Lys</sup>(UUU), HctRNA<sup>Arg</sup>(ACG), and HctRNA<sup>Phe</sup>(GAA) to be methylated by hTrmt13. Error bars represent mean  $\pm$  SD for at least three independent experiments.
- E The secondary structure of HctRNA<sup>Gly</sup>(GCC) summarizing the mutations in A: U (U4A), C: G (U4C), and G:C (U4G) base pairs.
- F The Um, Am, Cm, and Gm modification of HctRNA<sup>Gly</sup>(GCC), U4A, and U4C and U4G mutants was detected by mass spectrometry after hTrmt13 incubation.
- G Detection of Um4 in endogenous tRNA<sup>Gly</sup>(GCC) or Cm4 in tRNA<sup>Gly</sup>(CCC) using primer-extension assays. 40  $\mu\text{M}$  or 0.5  $\mu\text{M}$  dNTPs were used in the high or low dNTPs groups. The Nm modifications caused RT stop in low dNTPs groups, and the products (labeled by a star) are shorter than the RT read through products.

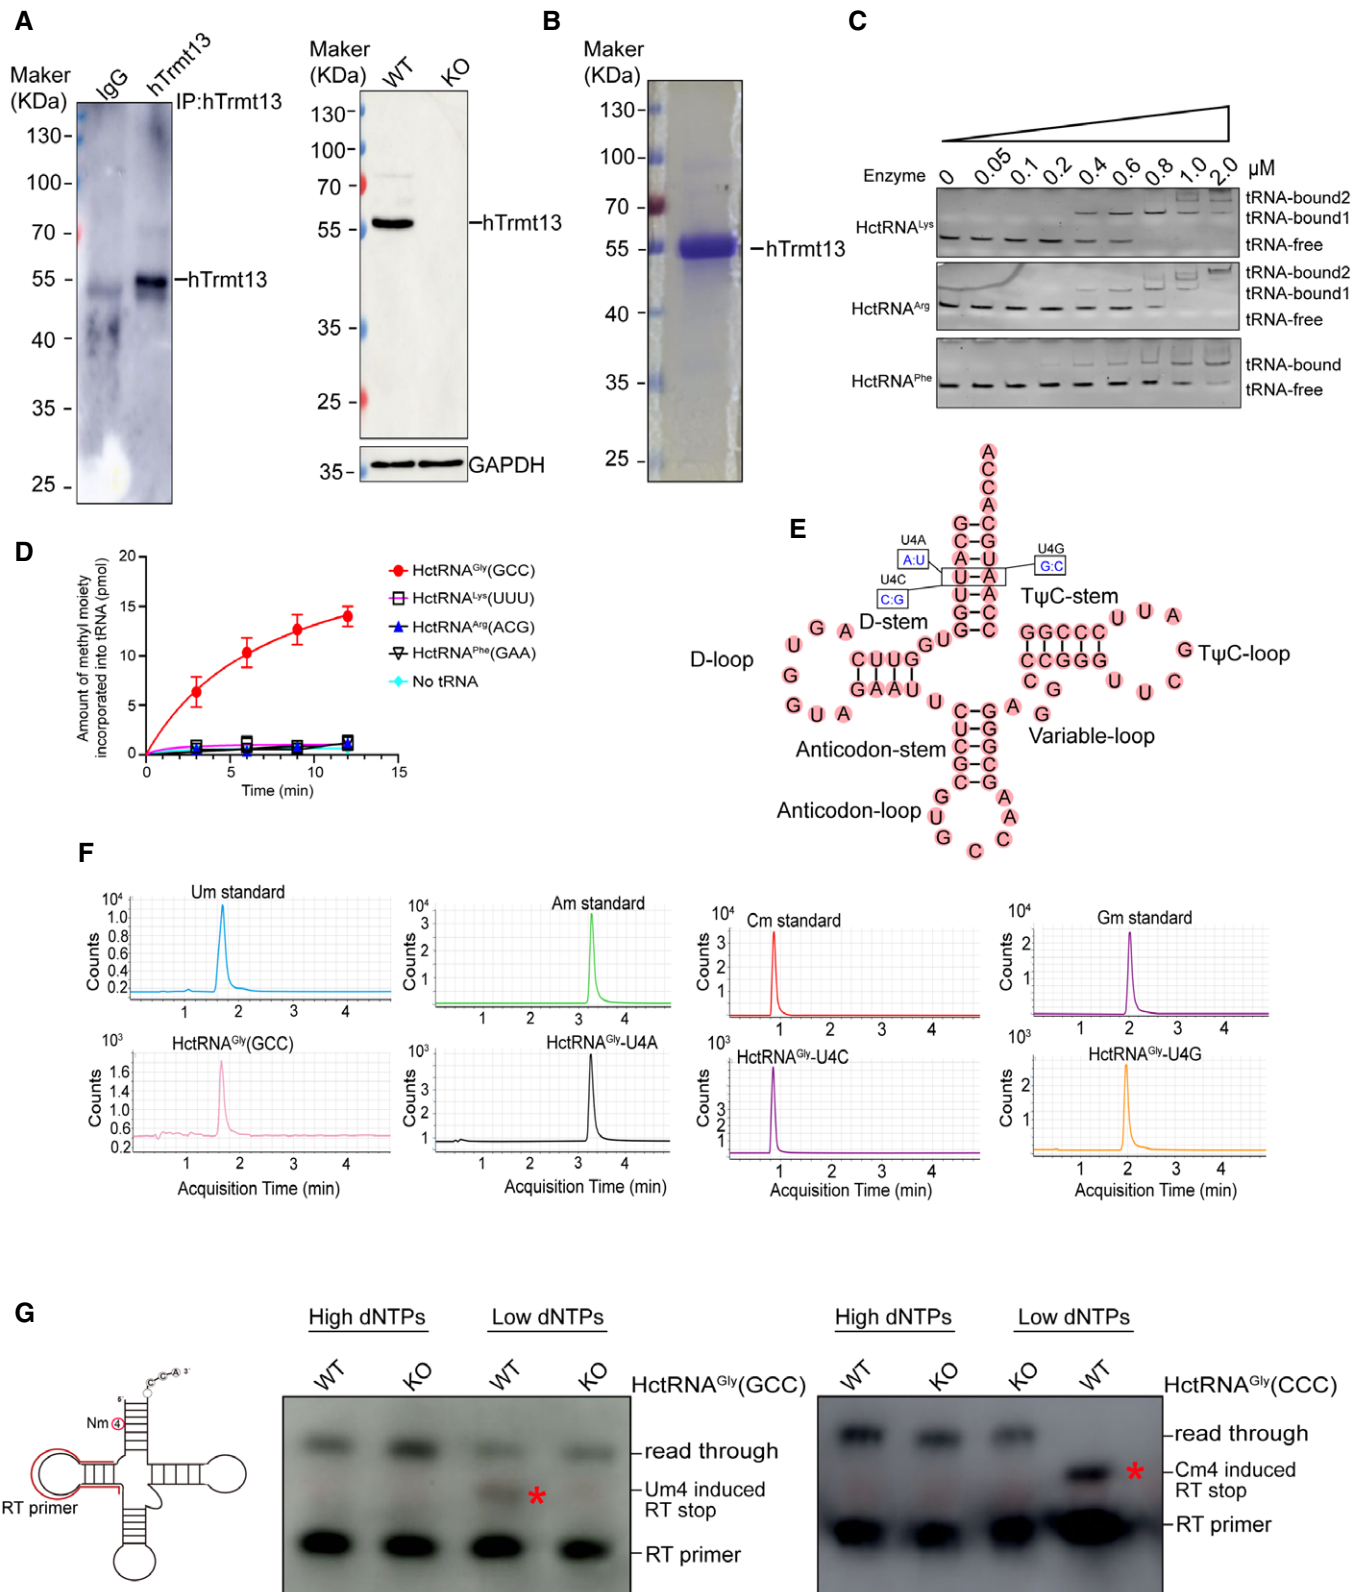

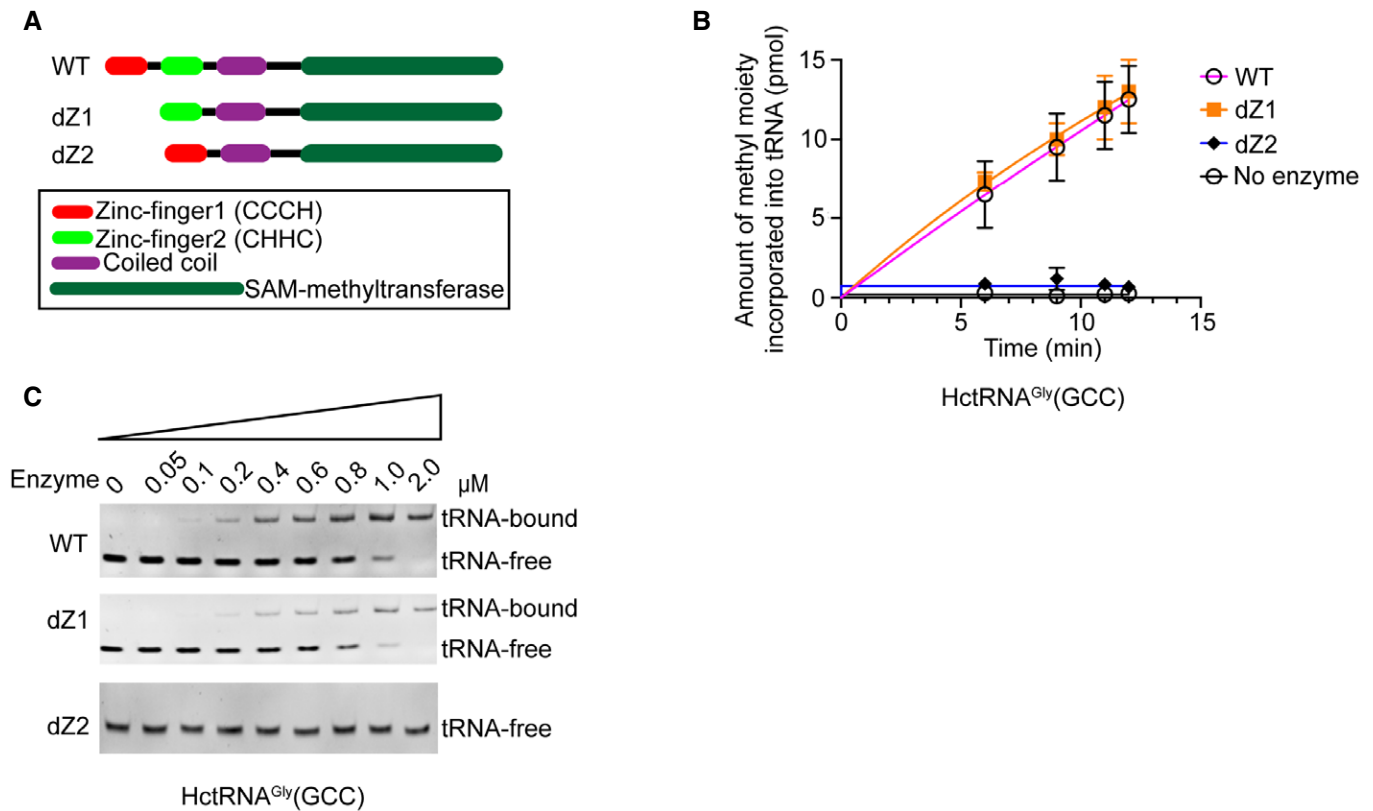

**Figure EV2. The CHHC Zn-2 domain is crucial for hTrmt13 binding to tRNA.**

- A Schematic diagram of the primary structure of hTrmt13 summarizing the mutations. dZ1 indicates deletion of the CCCH Zn-1 domain, and dZ2 indicates deletion of the CHHC Zn-2 domain.
- B The methyltransferase activities of hTrmt13 (WT) and its mutants (dZ1 and dZ2). For all experiments, three independent experiments were performed. Error bars represent mean  $\pm$  SD for three independent experiments.
- C The binding affinities of hTrmt13 and its mutants for HctRNA<sup>Gly</sup>(GCC) (0.15  $\mu$ M) analyzed by EMSA.

**Figure EV3. Identification of catalytic inactive mutation of hTrmt13 and analyses of tRFs.**

- A Analysis of the TCGA dataset for the mRNA expression of hTrmt13 and EIF4A2 in breast cancer patients. Spearman order correlation analysis was performed.
- B Schematic diagram of the primary structure of inactive hTrmt13 (E463A).
- C The methyltransferase activities of hTrmt13 and E463A mutant toward HctRNA<sup>Gly</sup>(GCC).
- D The mRNA level of hTrmt13 in shSCR, sh-1, sh-2, sh+WT, and sh+E463A were detected by RT-qPCR.
- E The polysome profiling of control (shSCR), hTrmt13 knockdown MDA-MB-231 cells (sh-1), and sh-1 with stable expression of hTrmt13 (sh-1+hTrmt13).
- F Statistical analysis of the tRNA steady state levels assayed by northern blot.
- G Statistical analysis of the *in vivo* aminoacylation level of hTrmt13 substrate tRNAs.
- H Workflow of obtaining cDNA from tRFs by two methods (stem-loop method and Poly-A tail method). Small RNAs were enriched by mirVana™ miRNA Isolation Kit (Thermo Scientific). The reverse transcription primer of the stem-loop method consists of two parts: (1) universal stem ring structure and (2) reverse complementary bases with the target tRF. For the Poly-A method, Oligo Dt was used as the reverse transcription primer for Poly-A tail, which was tagged to small RNAs using QuantiMir™ Kit (SBI).
- I RT-qPCR using a stem-loop primer to quantify the tRFs levels in shSCR, sh-1, and sh-2.
- J Poly-A-based RT-qPCR to quantify the level of 5'-Gly-CCC in shSCR and sh-1.
- K *De novo* protein synthesis in MDA-MB-231 cells transfected with different concentrations of 5'-Gly-CCC oligos.
- L *De novo* protein synthesis in MDA-MB-231 cells transfected with different concentrations of HctRNA<sup>Gly</sup>(CCC).
- Data information: In C, D, F, G, I, J, statistical analysis was performed using *t*-tests. Error bars indicate mean  $\pm$  SD for three independent experiments.

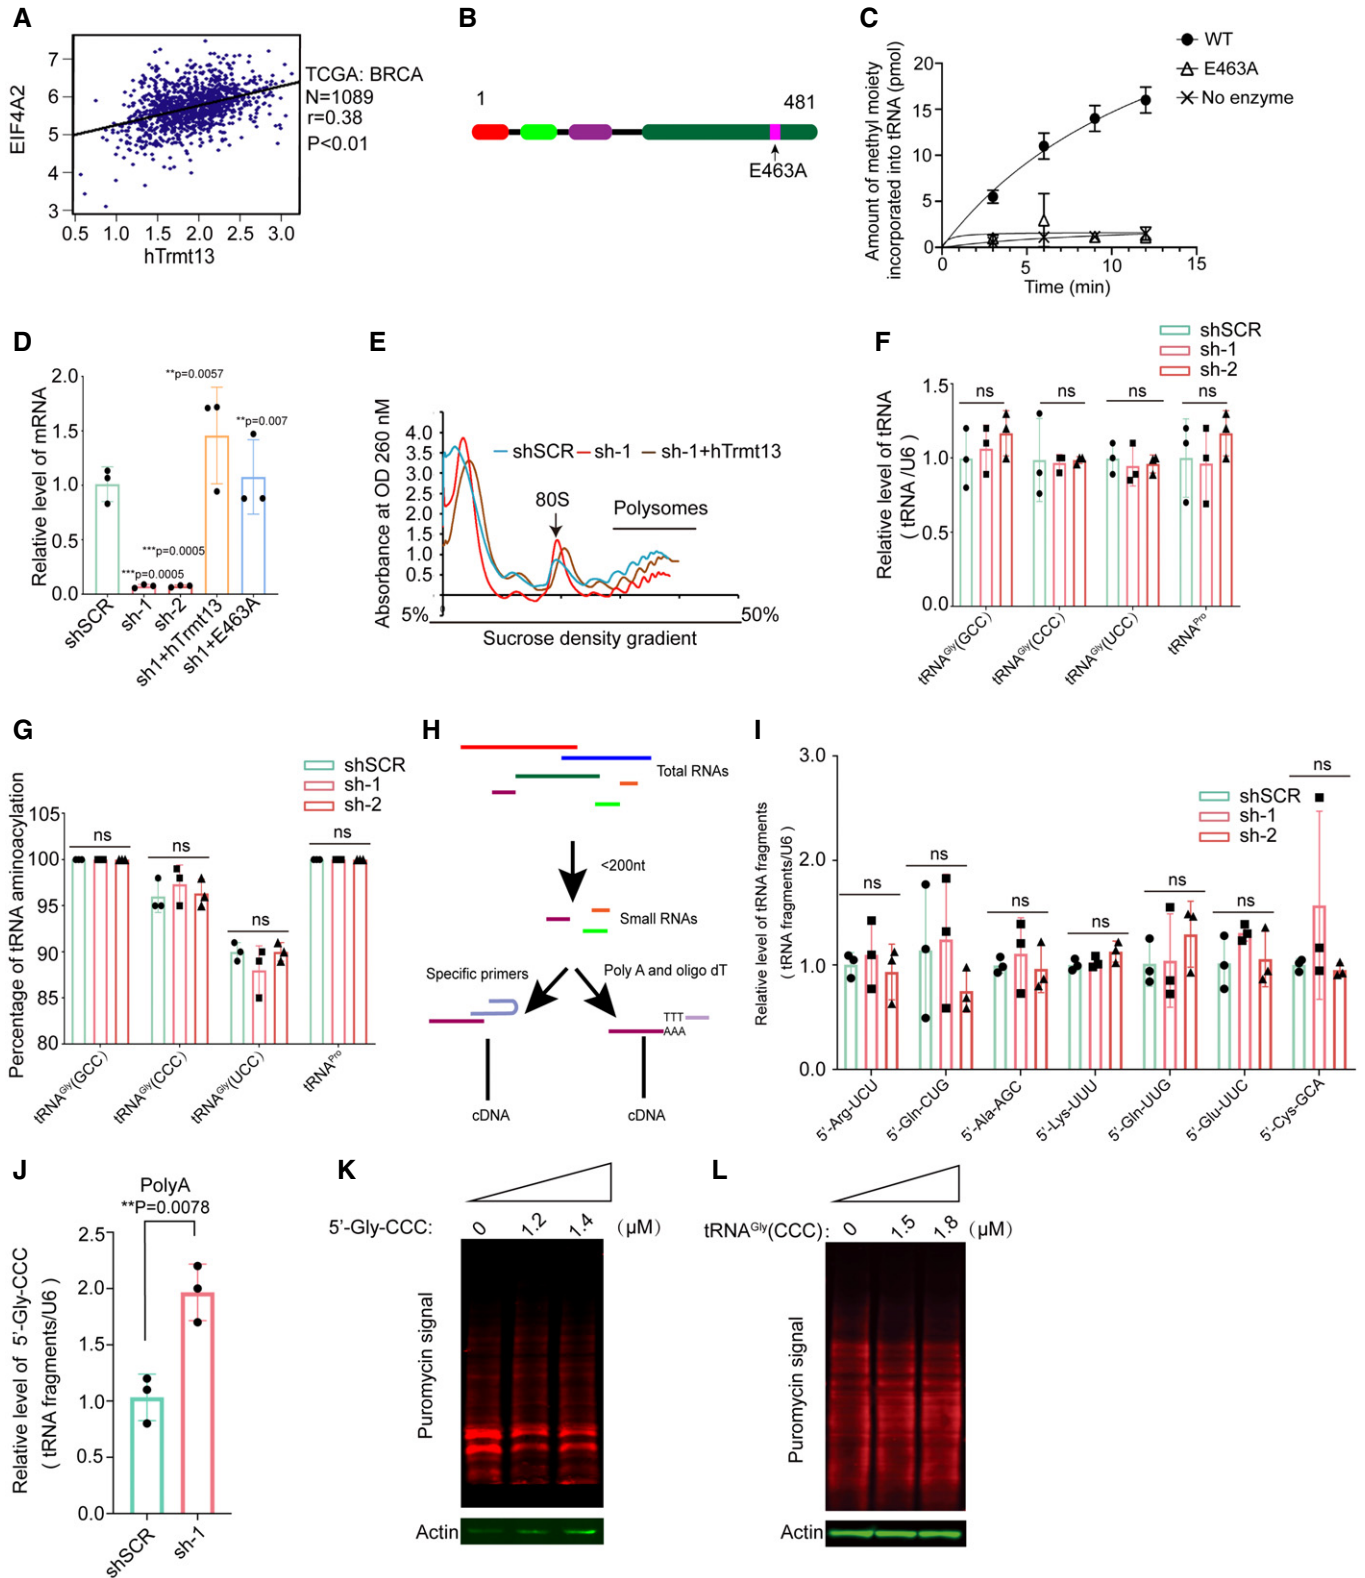

Figure EV3.

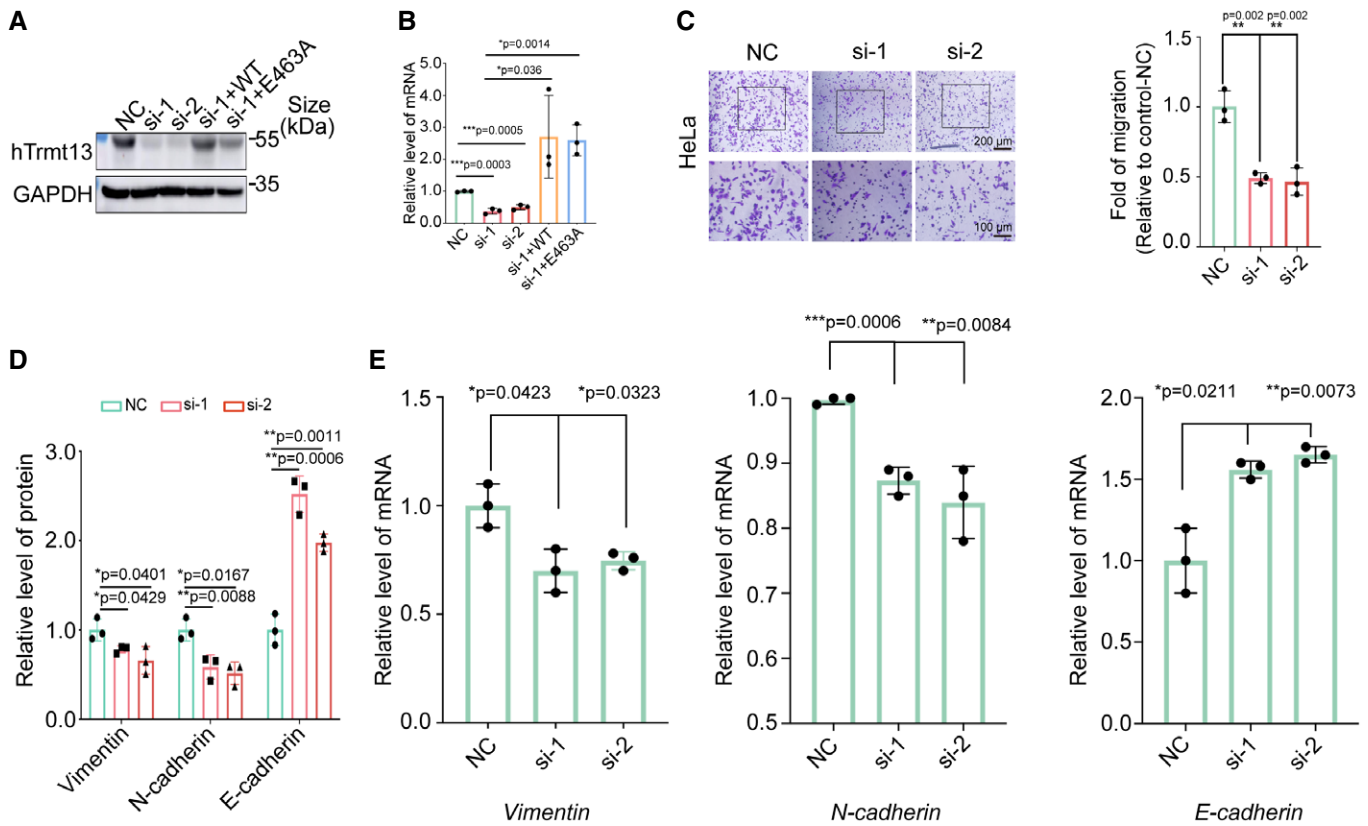

**Figure EV4. hTrmt13 regulates cancer cell migration.**

A, B Knockdown efficiency of hTrmt13 in MDA-MB-231 verified by Western blot (A) and by RT-qPCR (B).  
 C Transwell migration assays in HeLa cells infected with control siRNA (NC) or siRNA against hTrmt13 (si-1, si-2). Representative images (left) and statistical analysis (right) are shown. For each group, five different fields were chosen and counted using a microscope with 20-fold magnification.  
 D Statistical analysis of the expression of Vimentin, N-cadherin, and E-cadherin in control (NC) and hTrmt13 knockdown cells (si-1, si-2).  
 E RT-qPCR analysis of EMT-associated genes *Vimentin* (left), *N-cadherin* (middle), and *E-cadherin* (right) in hTrmt13 knockdown MDA-MB-231 cells compared to control.

Data information: In B–E, statistical analysis was performed using *t*-tests. Error bars represent mean  $\pm$  SD for three independent experiments.

**Figure EV5. hTrmt13 regulates *in vivo* cancer progression.**

A, B GSEA plot showing interesting gene sets from MSigDB that were enriched for gene expressed higher in *hTrmt13* low group for SMID\_BREAST\_CANCER\_HERBB2\_UP (A) and enriched for gene expressed higher in *hTrmt13* high group for TURASHVILI\_BREAST\_DUCTAL\_CARCINOMA\_VS\_DUCTAL\_NORMAL\_UP (B).  
 C Lung metastasis assay in mice model. MDA-MB-231-Luc-D3H2LN cells infected with lentivirus carrying control (shSCR) or shRNA against hTrmt13 (sh-2) were injected through the tail vein of 6-week-old female SCID mice ( $n = 4$ ). Lung metastasis was monitored by bioluminescent imaging after three weeks of injection. Representative *in vivo* bioluminescent images are shown (left); bioluminescent quantitation of lung metastasis (right). Statistical analysis was performed using *t*-tests. Error bars represent mean  $\pm$  SD from mice of shSCR or sh-2 groups.  
 D Immunohistochemical staining of 21 pancreatic carcinoma samples for hTrmt13 expression. Representative images are shown (left), and the mean staining intensity was analyzed by Image-Pro Plus software (right). Statistical analysis was performed using *t*-tests. Error bars represent mean  $\pm$  SD from patient samples.  
 E TCGA analysis of the relationship between the overall survival time (OS) of liver cancer patients (LIHC, left,  $n = 277$  (low)/88 (high), <http://ualcan.path.uab.edu/analysis.html>), patients with kidney renal clear cell carcinoma (KRIC, right,  $n = 260$  (low)/259 (high), <http://linkedomics.org/admin.php>), and their expression of hTrmt13 using TCGA online analysis website.  
 F Kaplan–Meier survival analysis (<http://kmplot.com/analysis/>) of Kaplan–Meier plotter for the relationship between relapse free survival (RFS) of breast cancer patients and their expression of *TGFBI* ( $n = 2537$  (low)/2392 (high)), *PKN2* ( $n = 3025$  (low)/1904 (high)), or *MEF2A* ( $n = 1307$  (low)/3622 (high)).

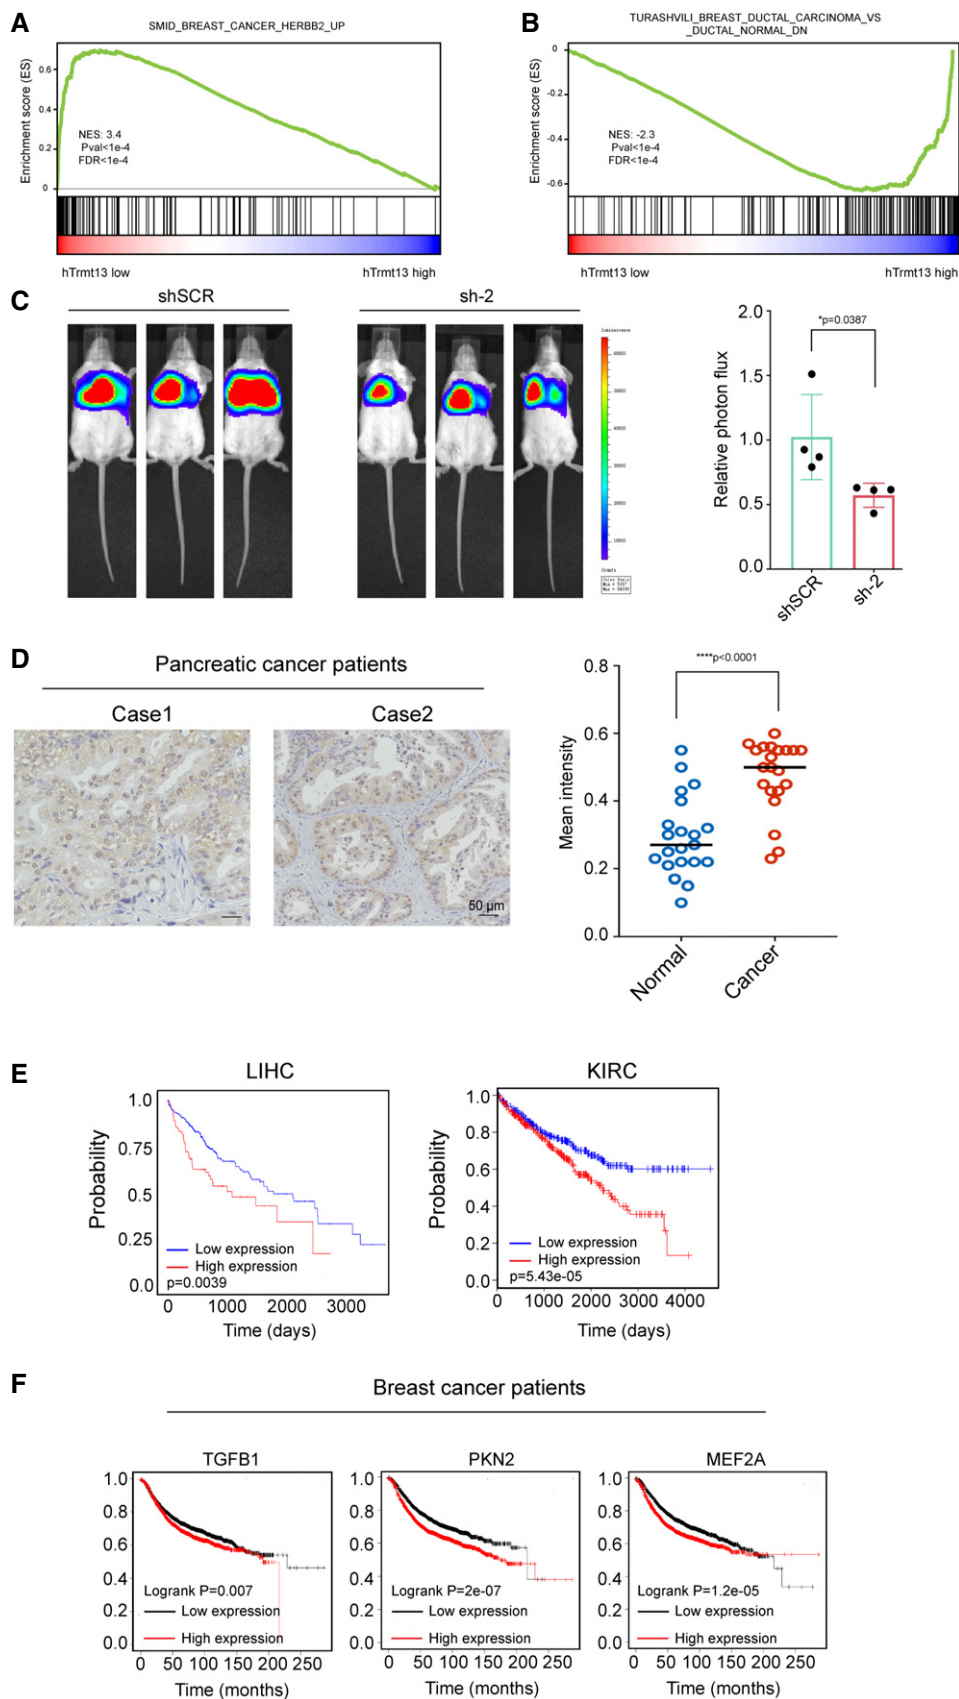

Figure EV5.
